# Supplementary material for: Biochemical analysis of nucleosome targeting by Tn5 transposase
Source: PubMed Central journal article supplement (PMC6731594; doi:10.1098/rsob.190116), 2019-08-14
Supplement: rsob190116supp1.pdf [file rsob190116supp1.pdf]

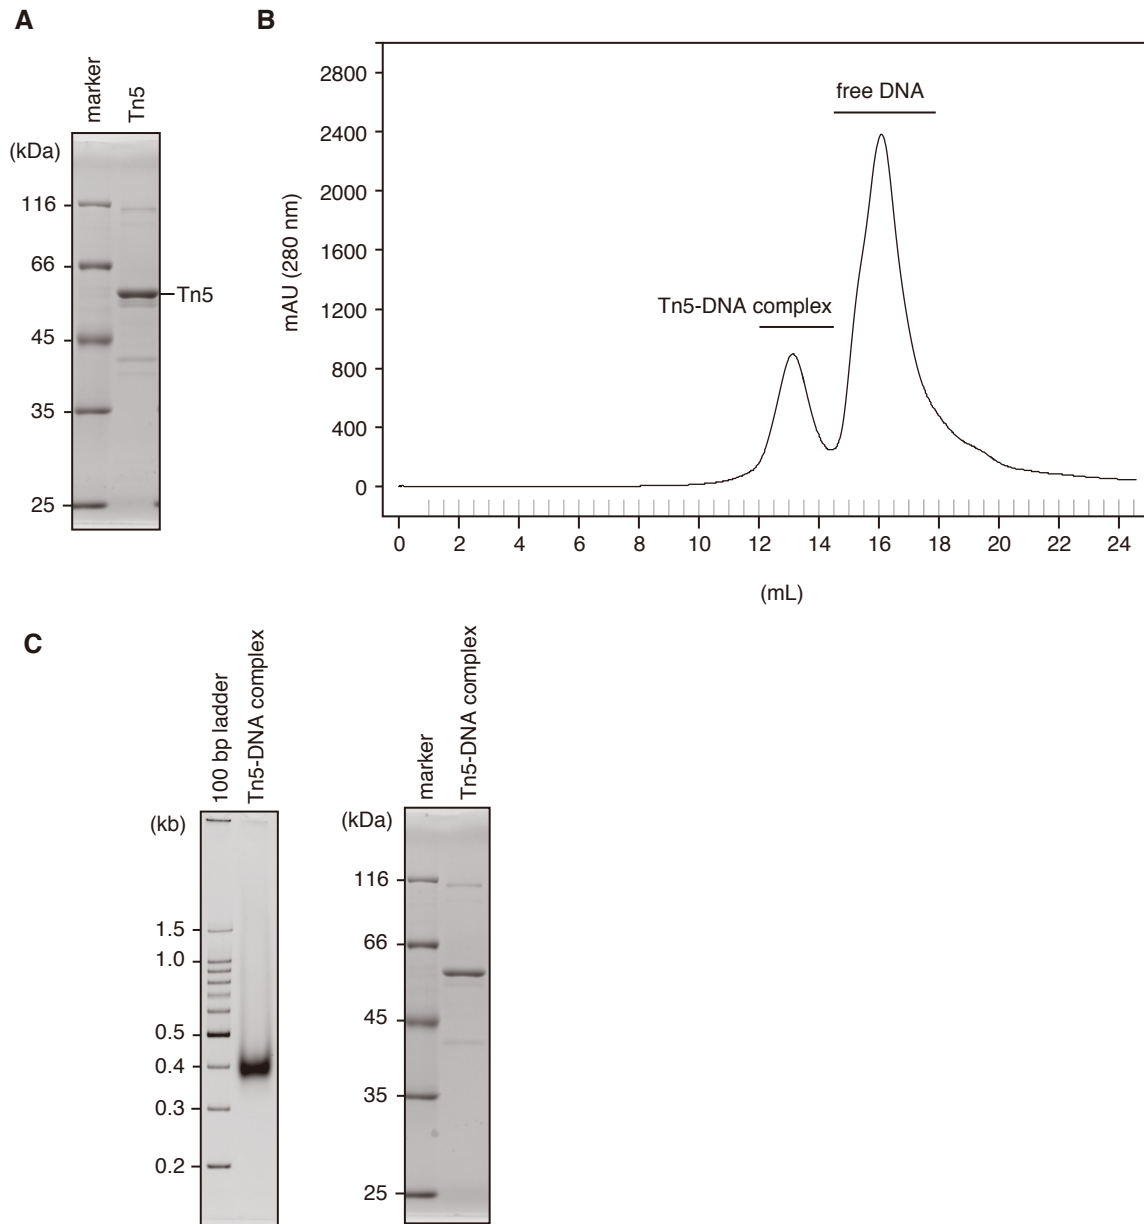

Supplementary figure S1. Preparation of the Tn5-DNA complex. (A) The purified Tn5 transposase was analyzed by denaturing polyacrylamide gel electrophoresis with Coomassie Brilliant Blue staining. (B) Representative results of size-exclusion chromatography to prepare the Tn5-DNA complex. Fractions containing the Tn5-DNA complex were collected. (C) The purified Tn5-DNA complex was analyzed by non-denaturing polyacrylamide gel electrophoresis with ethidium bromide staining (left panel), and denaturing polyacrylamide gel electrophoresis with Coomassie Brilliant Blue staining (right panel).

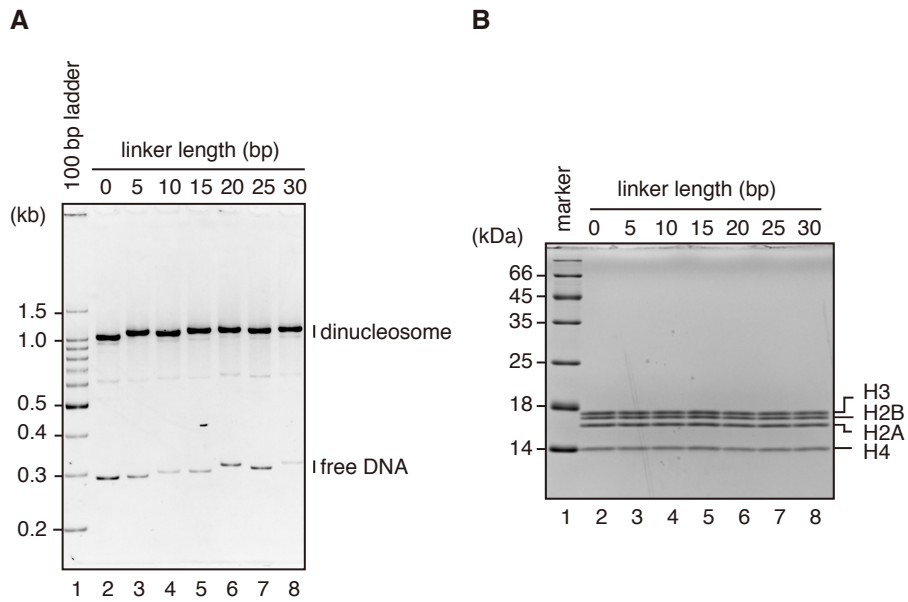

Supplementary figure S2. Preparation of dinucleosomes containing 0, 5, 10, 15, 20, 25, and 30 base-pair linker DNAs. (A) The reconstituted dinucleosomes were analyzed by non-denaturing polyacrylamide gel electrophoresis with ethidium bromide staining. The template-free DNAs exhibited unusual migration profiles, which do not correspond to the DNA length, probably due to the structural nature of the 601 sequence. The DNA sequences of these template DNAs were confirmed by direct sequencing. (B) The reconstituted dinucleosomes were analyzed by denaturing polyacrylamide gel electrophoresis with Coomassie Brilliant Blue staining.

**A**

```

601-15 bp 5'-ATCGACAATCCGGGTGCCGAGGCCGGCTCAATTGGTGGTAGACAGCTCTAGCACGGCTTAAACGGACGTACGCGGTGTCCCGCGCTTTTAAACGGCCAAGGGGATTA-3'
601-30 bp 5'-ATCGACAATCCGGGTGCCGAGGCCGGCTCAATTGGTGGTAGACAGCTCTAGCACGGCTTAAACGGACGTACGCGGTGTCCCGCGCTTTTAAACGGCCAAGGGGATTA-3'
603-15 bp 5'-ATCAGTTGGCGGGCCCACTACCGTGTGAAGTCGTGACTCGGGCTTCTAAGTACGGTTAGCGGCACGGTAGAGGGCAATCCAAAGGCTAACCCACCGTGCATCGATGTTGA-3'
603-30 bp 5'-ATCAGTTGGCGGGCCCACTACCGTGTGAAGTCGTGACTCGGGCTTCTAAGTACGGTTAGCGGCACGGTAGAGGGCAATCCAAAGGCTAACCCACCGTGCATCGATGTTGA-3'

601-15 bp 5'-CCCTAGTCTCCAGGACGCTGTGAGATATATACATCCAGGcctt g t s t o g c t a g c ATCGACAATCCGGGTGCCGAGGCCGGCTCAATTGGTGGTA-3'
601-30 bp 5'-CCCTAGTCTCCAGGACGCTGTGAGATATATACATCCAGGcctt g t s t o g c t a g c t g a a t c c g g e c c a g g ATCGACAATCCGGGTGCCGAGGCCGGCTCAATTGGTGGTA-3'
603-15 bp 5'-AAGAGGCCTCCGTCTTATTACTTCAAGTCCTGGGGT a a g c t t t c t c e e e t g CCGAGTTCCGGGGCCCACTACCGTGTGAAGTCGTGACT-3'
603-30 bp 5'-AAGAGGCCTCCGTCTTATTACTTCAAGTCCTGGGGT a c c g l t l c g k t g c c a a g c t t t c t c e e e t g CCGAGTTCCGGGGCCCACTACCGTGTGAAGTCGTGACT-3'

601-15 bp 5'-GACAGCTCTAGCACGGCTTAAACGGACGTACGCGCTGTCCCGCGCTTTTAAACGGCCAAGGGGATTA-3'
601-30 bp 5'-GACAGCTCTAGCACGGCTTAAACGGACGTACGCGCTGTCCCGCGCTTTTAAACGGCCAAGGGGATTA-3'
603-15 bp 5'-CGGGCTTCTAAGTAGGCTTAGGGCACGGTAGAGGGCAATCCAAAGGCTAACCCACCGTGCATCGATGTTGAAGAGGGCCCTCCGTCTTATTA-3'
603-30 bp 5'-CGGGCTTCTAAGTAGGCTTAGGGCACGGTAGAGGGCAATCCAAAGGCTAACCCACCGTGCATCGATGTTGAAGAGGGCCCTCCGTCTTATTA-3'

```

**B**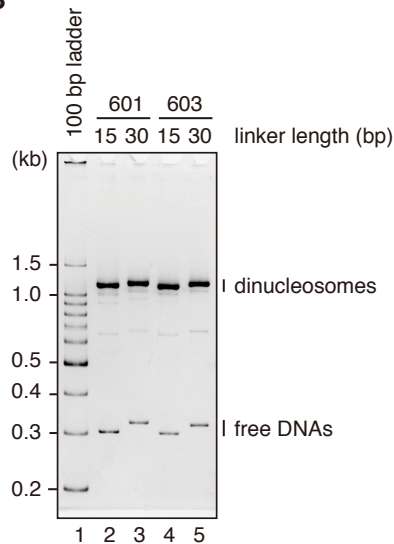**C**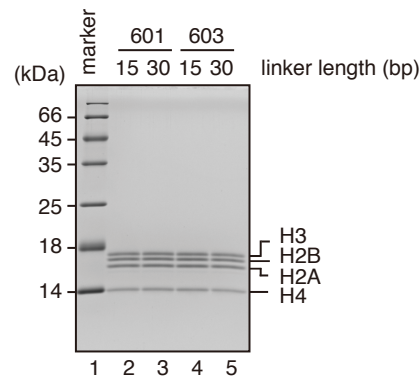

Supplementary figure S3. Preparation of dinucleosomes containing the 601 and 603 sequences. (A) DNA sequences of the substrates. Capital letters represent the 601 and 603 sequences. Small letters represent the linker DNAs. The reconstituted dinucleosomes were analyzed by non-denaturing polyacrylamide gel electrophoresis with ethidium bromide staining (B), and denaturing polyacrylamide gel electrophoresis with Coomassie Brilliant Blue staining (C).

601-0 bp-601

ATCGACAATCCCGGTGCCGAGGCCGCTCAATTGGTCGTAGACAGCTCTAGCACCGCTTAAACGCACGTACGCGCTGTCCCCGCGTTTTAACC  
 GCCAAGGGGATTACTCCCTAGTCTCCAGGCACGTGTCAGATATATACATCCAGGATCGACAATCCCGGTGCCGAGGCCGCTCAATTGGTCGTAG  
 ACAGCTCTAGCACCGCTTAAACGCACGTACGCGCTGTCCCCGCGTTTTAACCGCCAAGGGGATTACTCCCTAGTCTCCAGGCACGTGTCAGAT  
 ATATACATCCGAT

601-5 bp-601

ATCGACAATCCCGGTGCCGAGGCCGCTCAATTGGTCGTAGACAGCTCTAGCACCGCTTAAACGCACGTACGCGCTGTCCCCGCGTTTTAACC  
 GCCAAGGGGATTACTCCCTAGTCTCCAGGCACGTGTCAGATATATACATCCAGGCCTTGTGTCGATCGACAATCCCGGTGCCGAGGCCGCTCAATTGGT  
 CGTAGACAGCTCTAGCACCGCTTAAACGCACGTACGCGCTGTCCCCGCGTTTTAACCGCCAAGGGGATTACTCCCTAGTCTCCAGGCACGTG  
 CAGATATATACATCCGAT

601-10 bp-601

ATCGACAATCCCGGTGCCGAGGCCGCTCAATTGGTCGTAGACAGCTCTAGCACCGCTTAAACGCACGTACGCGCTGTCCCCGCGTTTTAACC  
 GCCAAGGGGATTACTCCCTAGTCTCCAGGCACGTGTCAGATATATACATCCAGGCCTTGTGTCGATCGACAATCCCGGTGCCGAGGCCGCTCAA  
 TTGGTCGTAGACAGCTCTAGCACCGCTTAAACGCACGTACGCGCTGTCCCCGCGTTTTAACCGCCAAGGGGATTACTCCCTAGTCTCCAGGCA  
 CGTGTGTCAGATATATACATCCGAT

601-15 bp-601

ATCGACAATCCCGGTGCCGAGGCCGCTCAATTGGTCGTAGACAGCTCTAGCACCGCTTAAACGCACGTACGCGCTGTCCCCGCGTTTTAACC  
 GCCAAGGGGATTACTCCCTAGTCTCCAGGCACGTGTCAGATATATACATCCAGGCCTTGTGTCGCTAGCATCGACAATCCCGGTGCCGAGGCC  
 GCTCAATTGGTCGTAGACAGCTCTAGCACCGCTTAAACGCACGTACGCGCTGTCCCCGCGTTTTAACCGCCAAGGGGATTACTCCCTAGTCTC  
 CAGGCACGTGTCAGATATATACATCCGAT

601-20 bp-601

ATCGACAATCCCGGTGCCGAGGCCGCTCAATTGGTCGTAGACAGCTCTAGCACCGCTTAAACGCACGTACGCGCTGTCCCCGCGTTTTAACC  
 GCCAAGGGGATTACTCCCTAGTCTCCAGGCACGTGTCAGATATATACATCCAGGCCTTGTGTCGCTAGCTGAATATCGACAATCCCGGTGCCGA  
 GGCCGCTCAATTGGTCGTAGACAGCTCTAGCACCGCTTAAACGCACGTACGCGCTGTCCCCGCGTTTTAACCGCCAAGGGGATTACTCCCTA  
 GTCTCCAGGCACGTGTCAGATATATACATCCGAT

601-25 bp-601

ATCGACAATCCCGGTGCCGAGGCCGCTCAATTGGTCGTAGACAGCTCTAGCACCGCTTAAACGCACGTACGCGCTGTCCCCGCGTTTTAACC  
 GCCAAGGGGATTACTCCCTAGTCTCCAGGCACGTGTCAGATATATACATCCAGGCCTTGTGTCGCTAGCTGAATCCGAGATCGACAATCCCGGT  
 GCCGAGGCCGCTCAATTGGTCGTAGACAGCTCTAGCACCGCTTAAACGCACGTACGCGCTGTCCCCGCGTTTTAACCGCCAAGGGGATTACT  
 CCCTAGTCTCCAGGCACGTGTCAGATATATACATCCGAT

601-30 bp-601

ATCGACAATCCCGGTGCCGAGGCCGCTCAATTGGTCGTAGACAGCTCTAGCACCGCTTAAACGCACGTACGCGCTGTCCCCGCGTTTTAACC  
 GCCAAGGGGATTACTCCCTAGTCTCCAGGCACGTGTCAGATATATACATCCAGGCCTTGTGTCGCTAGCTGAATCCGAGCCAGGATCGACAATC  
 CCGGTGCCGAGGCCGCTCAATTGGTCGTAGACAGCTCTAGCACCGCTTAAACGCACGTACGCGCTGTCCCCGCGTTTTAACCGCCAAGGGGA  
 TTA

603-15 bp-603

ATCAGTTCGCGCGCCACCTACCGTGTGAAGTCGTCACTCGGGCTTCTAAGTACGCTTAGCGCACGGTAGAGCGCAATCCAAGGCTAACCACC  
 GTGCATCGATGTTGAAAGAGGCCCTCCGTCCTTATTACTTCAAGTCCCTGGGGTAAGCTTCTCGGGTGCCAGTTCGCGCGCCACCTACCGT  
 GTGAAGTCGTCACTCGGGCTTCTAAGTACGCTTAGCGCACGGTAGAGCGCAATCCAAGGCTAACCACCGTGCATCGATGTTGAAAGAGGCCCT  
 CCGTCCTTATTACTTCAAGTCCCTGGGAT

603-30 bp-603

ATCAGTTCGCGCGCCACCTACCGTGTGAAGTCGTCACTCGGGCTTCTAAGTACGCTTAGCGCACGGTAGAGCGCAATCCAAGGCTAACCACC  
 GTGCATCGATGTTGAAAGAGGCCCTCCGTCCTTATTACTTCAAGTCCCTGGGGTACCCGTTTCGGTGCCAAGCTTCTCGGGTGCCAGTTCG  
 GCGCCACCTACCGTGTGAAGTCGTCACTCGGGCTTCTAAGTACGCTTAGCGCACGGTAGAGCGCAATCCAAGGCTAACCACCGTGCATCGAT  
 GTTGAAGAGGCCCTCCGTCCTTATTACTTCAAGTCCCTGGGAT

Supplementary figure S4. The sequences of the DNA fragments used for the dinucleosome reconstitution. The linker DNA regions are underlined.

**Supplementary table S1.** The major cleavage sites by the Tn5-DNA complex in the dinucleosome and naked DNA substrates.

| sample                            | positions<br>(counts)       |                             |                            |                            |                           |
|-----------------------------------|-----------------------------|-----------------------------|----------------------------|----------------------------|---------------------------|
| 601-15 nucleosome<br>upper strand | 5'-141<br>(7,333)           | 5'-160<br>(1,921)           | 5'-140<br>(1,565)          | 5'-142<br>(1,155)          | 5'-161<br>(522)           |
| 601-15 nucleosome<br>lower strand | 5'-149<br>(10,721)          | 5'-148<br>(2,823)           | 5'-150<br>(2,492)          | 5'-168<br>(1,217)          | 5'-159<br>(207)           |
| 601-15 DNA<br>upper strand        | 5'-207<br>(3,060)           | 5'-196<br>(2,529)           | 5'-217<br>(1,160)          | 5'-228<br>(922)            | 5'-206<br>(881)           |
| 601-15 DNA<br>lower strand        | 5'-53 or 5'-215<br>(3,066)  | 5'-140 or 5'-302<br>(1,355) | 5'-63 or 5'-225<br>(1,262) | 5'-74 or 5'-236<br>(1,220) | 5'-124 or 5'-286<br>(690) |
| 601-30 nucleosome<br>upper strand | 5'-160<br>(4,605)           | 5'-141<br>(3,539)           | 5'-176<br>(1,353)          | 5'-175<br>(1,182)          | 5'-166<br>(738)           |
| 601-30 nucleosome<br>lower strand | 5'-149<br>(11,264)          | 5'-168<br>(2,901)           | 5'-148<br>(2,400)          | 5'-150<br>(2,254)          | 5'-157<br>(882)           |
| 601-30 DNA<br>upper strand        | 5'-222<br>(5,119)           | 5'-211<br>(4,070)           | 5'-232<br>(2,099)          | 5'-221<br>(1,575)          | 5'-243<br>(1,506)         |
| 601-30 DNA<br>lower strand        | 5'-140 or 5'-317<br>(1,783) | 5'-53 or 5'-230<br>(1,682)  | 5'-74 or 5'-251<br>(1,336) | 5'-79 or 5'-256<br>(936)   | 5'-63 or 5'-240<br>(896)  |
| 603-15 nucleosome<br>upper strand | 5'-161<br>(6,620)           | 5'-140<br>(2,415)           | 5'-160<br>(2,306)          | 5'-150<br>(2,302)          | 5'-143<br>(1,888)         |
| 603-15 Nucleosome<br>lower strand | 5'-169<br>(4,514)           | 5'-148<br>(4,341)           | 5'-158<br>(3,023)          | 5'-151<br>(2,608)          | 5'-160<br>(2,169)         |
| 603-15 DNA<br>upper strand        | 5'-229<br>(170)             | 5'-176<br>(123)             | 5'-239<br>(108)            | 5'-178<br>(63)             | 5'-227<br>(63)            |
| 603-15 DNA<br>lower strand        | 5'-85<br>(312)              | 5'-75<br>(222)              | 5'-92<br>(171)             | 5'-73<br>(74)              | 5'-90<br>(74)             |
| 603-30 nucleosome<br>upper strand | 5'-158<br>(5,814)           | 5'-176<br>(2,976)           | 5'-167<br>(1,968)          | 5'-165<br>(1,123)          | 5'-175<br>(947)           |
| 603-30 nucleosome<br>lower strand | 5'-146<br>(7,310)           | 5'-166<br>(5,829)           | 5'-175<br>(2,148)          | 5'-149<br>(1,966)          | 5'-151<br>(1,296)         |
| 603-30 DNA<br>upper strand        | 5'-244<br>(3,339)           | 5'-254<br>(1,574)           | 5'-242<br>(1,464)          | 5'-237<br>(1,450)          | 5'-191<br>(1,417)         |
| 603-30 DNA<br>lower strand        | 5'-85<br>(3,793)            | 5'-75<br>(3,440)            | 5'-92<br>(1,908)           | 5'-73<br>(1,029)           | 5'-68<br>(943)            |
